# Supplementary material for: The transcriptional corepressor CTBP-1 acts with the SOX family transcription factor EGL-13 to maintain AIA interneuron cell identity in Caenorhabditis elegans
Source: eLife journal article supplement (doi:10.7554/elife.74557), 2022-01-20
Supplement: fig1-data1 [file Fig 1_S1D_tm5512 results.xlsx]

## Sheet: Sheet1
nIs175 expression in the AIAs of ctbp-1(tm5512) mutants						Paper figure S1D
strain	stage	OFF in AIAs	ON in AIAs	% ON
tm5512	L1	99	1	1
	L4	2	98	98
