# Supplementary material for: The transcriptional corepressor CTBP-1 acts with the SOX family transcription factor EGL-13 to maintain AIA interneuron cell identity in Caenorhabditis elegans
Source: eLife journal article supplement (doi:10.7554/elife.74557), 2022-01-20
Supplement: fig1-data1 [file Fig 1_S2A_nIs175 misexpression counts.xlsx]

## Sheet: Sheet1
nIs175 expression in AIAs of L4 worms						Paper Figure S2A
strain	ON in AIA	OFF in AIA	% ON in AIA	n
Wild type	0	100	0	100
ctbp-1(n4784)	98	2	98	100
ctbp-1(n4808)	98	2	98	100
ctbp-1(n4784)+nEx2346[ctbp-1(+)]	12	88	12	100
ctbp-1(n4784)+nEx2347[ctbp-1(+)]	4	96	4	100
ctbp-1(n4784)+nIs743[PAIA::ctbp-1(+)]	0	100	0	100
