# Supplementary material for: The transcriptional corepressor CTBP-1 acts with the SOX family transcription factor EGL-13 to maintain AIA interneuron cell identity in Caenorhabditis elegans
Source: eLife journal article supplement (doi:10.7554/elife.74557), 2022-01-20
Supplement: fig1-data1 [file Fig 1_S2B_heat shock counts.xlsx]

## Sheet: Sheet1
nIs175 reporter expression in the AIAs of ctbp-1(n4784); nEx[Phsp::ctbp-1(+)] worms								Paper Figure S2B
Stage	ON in AIA	OFF in AIA	% ON in AIA	n
L1	8	92	8	100
L4	99	1	99	100
D1A no HS	100	0	100	100
D1A w/ HS	8	92	8	100
