# Supplementary material for: The transcriptional corepressor CTBP-1 acts with the SOX family transcription factor EGL-13 to maintain AIA interneuron cell identity in Caenorhabditis elegans
Source: eLife journal article supplement (doi:10.7554/elife.74557), 2022-01-20
Supplement: fig2-data1 [file Fig 2_S1A-B_reporter expression.xlsx]

## Sheet: Sheet1
M4 and AIA reporter expression in L4 wild-type and ctbp-1(n4784) worms						Paper figure S3		quantification of worms shown in Fig. 2
	Wild type					ctbp-1(n4784)
reporter	ON in M4	% ON in M4	ON in AIA	% ON in AIA	n	ON in M4	% ON in M4	ON in AIA	% ON in AIA	n
ayIs4[egl-13:gfp]	50	100	0	0	50	50	100	0	0	50
ctIs43[dbl-1::gfp]	50	100	0	0	50	50	100	0	0	50
nIs491[ser-7.b::mCherry]	50	100	0	0	50	50	100	0	0	50
ynIs80[flp-21::gfp]	50	100	0	0	50	50	100	0	0	50
nIs843[gcy-28.d::mCherry]	0	0	50	100	50	0	0	50	100	50
otIs326[ins-1::gfp]	0	0	50	100	50	0	0	50	100	50
peIs1716[ins-1::gfp+ttx-3::mCherry]	0	0	50	100	50	0	0	50	100	50
otIs379[cho-1::gfp]	0	0	50	100	50	0	0	50	100	50
otIs317[mgl-1::mCherry]	0	0	50	100	50	0	0	50	100	50
