# Supplementary material for: The transcriptional corepressor CTBP-1 acts with the SOX family transcription factor EGL-13 to maintain AIA interneuron cell identity in Caenorhabditis elegans
Source: eLife journal article supplement (doi:10.7554/elife.74557), 2022-01-20
Supplement: fig3-data1 [file Fig 3_S1A_AIA Area.xlsx]

## Sheet: Sheet1
Measuring AIA maximum cell area in Wild type and ctbp-1(n4784)								Paper Figure S4A
WT			ctbp-1(n4784)
L1	L4	Adult	L1	L4	Adult
5.787	15.722	17.076	4.718	14.712	19.459		units = um^2
9.014	13.143	16.919	5.443	18.39	22.421
4.041	10.593	13.555	5.944	21.352	28.385
4.58	17.213	14.065	5.865	11.328	20.264
3.374	17.017	18.773	4.767	15.595	18.017
6.258	17.311	20.93	3.845	15.487	21.068
5.699	12.005	22.519	5.316	17.596	18.047
7.719	17.802	21.342	4.806	18.322	19.165
6.464	20.999	18.223	6.385	13.584	21.705
5.287	19.773	23.098	7.788	16.497	15.928
7.023	17.262	29.875	6.395	13.937	13.486
7.385	20.921	24.304	8.386	14.467	14.124
8.082	15.507	18.498	5.914	15.252	19.028
5.875	15.644	12.633	6.11	17.076	23.255
3.943	22.578	22.176	8.278	18.812	19.616
6.042	15.144	23.451	6.758	13.604	18.243
8.062	13.741	22.549	6.807	14.761	22.765
8.984	14.604	22.294	5.385	13.81	19.214
5.659	18.645	22.264	8.994	11.132	18.459
8.621	17.655	20.097	3.482	13.535	17.547
3.364	15.742	17.684	4.551	20.322	16.948
4.492	14.183	17.458	7.336	19.881	25.148
5.306	14.84	13.712	5.581	17.36	19.381
7.807	15.693	14.124	6.925	15.31	16.497
4.002	16.723	27.777	8.121	18.508	22.843
6.728	18.42	16.497	4.826	15.222	19.145
6.562	11.632	19.116	8.455	12.839	25.403
6.003	16.566	17.409	6.375	13.79	14.987
5.296	17.762	23.549	5.326	20.159	16.919
5.139	16.948	19.734	5.404	18.518	20.185
	12.299	19.155		20.46
	19.391
