# Supplementary material for: The transcriptional corepressor CTBP-1 acts with the SOX family transcription factor EGL-13 to maintain AIA interneuron cell identity in Caenorhabditis elegans
Source: eLife journal article supplement (doi:10.7554/elife.74557), 2022-01-20
Supplement: fig3-data1 [file Fig 3_S2A-C_heat shock results.xlsx]

## Sheet: Sheet1
AIA morphology in WT and ctbp-1(n4784) mutants w/o rescue construct following Heat Shock									Paper Figure S5A-C
Projections									AIA lengths
strain	repeat	number scored	Ant Proj?	% w/ Ant	Post Proj?	% w/ Proj			cell #	nIs175	nIs175+HS	nIs175;n4784	nIs175;n4784+HS	units = um
nIs175	1	30	2	0.0666667	0	0			1	7.426	9.455	8.631	8.858
	2	30	0	0	0	0			2	9.246	7.713	10.898	8.269
	3	30	1	0.0333333	0	0			3	7.719	8.135	8.907	7.918
nIs175 + HS	1	30	1	0.0333333	0	0			4	8.366	7.419	8.75	8.655
	2	30	1	0.0333333	0	0			5	8.065	9.193	11.948	10.858
	3	30	1	0.0333333	1	0.0333333			6	8.084	7.215	8.631	10.86
nIs175;n4784	1	30	17	0.566667	12	0.4			7	7.897	8.583	9.699	9.923
	2	30	14	0.466667	9	0.3			8	7.455	8.612	10.118	12.433
	3	30	16	0.533333	13	0.433333			9	8.575	7.448	9.867	8.597
nIs175;n4784 + HS	1	30	16	0.533333	13	0.433333			10	8.631	7.954	11.545	9.412
	2	30	15	0.5	8	0.266667			11	8.161	9.961	6.531	8.469
	3	30	17	0.566667	12	0.4			12	9.233	8.576	9.177	9.465
									13	7.319	5.239	9.386	10.037
									14	7.114	10.326	9.356	8.434
									15	6.864	9.804	9.427	8.383
									16	7.1	9.782	9.626	6.629
									17	6.501	8.023	9.779	8.807
									18	8.89	10.576	11.798	10.468
									19	6.785	6.652	9.185	10.121
									20	7.194	5.951	9.508	7.964
									21	5.694	7.972	8.692	9.218
									22	7.123	8.633	9.976	7.402
									23	8.024	6.713	8.495	9.989
									24	8.647	6.764	7.865	8.73
									25	6.226	7.589	8.737	10.726
									26	8.251	7.58	7.597	10.381
									27	9.459	8.572	8.233	7.809
									28	10.692	7.673	10.199	8.532
									29	6.315	6.451	10.594	7.083
									30	7.688	7.076	8.473	8.9
									31		8.256		8.307
									32				10.685
