# Supplementary material for: The transcriptional corepressor CTBP-1 acts with the SOX family transcription factor EGL-13 to maintain AIA interneuron cell identity in Caenorhabditis elegans
Source: eLife journal article supplement (doi:10.7554/elife.74557), 2022-01-20
Supplement: fig3-data1 [file Fig 3B-C_AIA projections.xlsx]

## Sheet: Sheet1
AIA projection counts, wild type vs ctbp-1 mutants					Paper figure 3B-C
strain	stage	repeat	# w/ anterior proj.	% w/ anterior proj.	# w/ posterior proj.	% w/ posterior proj.		n = 60 for all repeats
Wild type	L1	1	0	0	0	0
		2	0	0	0	0
		3	0	0	0	0
		4	0	0	0	0
	L4	1	0	0	0	0
		2	0	0	0	0
		3	0	0	0	0
		4	1	1.66667	0	0
	D1	1	3	5	0	0
		2	2	3.33333	0	0
		3	0	0	0	0
		4	1	1.66667	0	0
nIs348;ctbp-1(n4784)	L1	1	3	5	1	1.66667
		2	4	6.66667	0	0
		3	2	3.33333	0	0
		4	5	8.33333	0	0
	L4	1	29	48.3333	22	36.6667
		2	20	33.3333	10	16.6667
		3	24	40	10	16.6667
		4	21	35	17	28.3333
	D1	1	33	55	21	35
		2	29	48.3333	20	33.3333
		3	28	46.6667	15	25
		4	30	50	23	38.3333
