# Supplementary material for: The transcriptional corepressor CTBP-1 acts with the SOX family transcription factor EGL-13 to maintain AIA interneuron cell identity in Caenorhabditis elegans
Source: eLife journal article supplement (doi:10.7554/elife.74557), 2022-01-20
Supplement: fig3-data1 [file Fig 3D_AIA lengths.xlsx]

## Sheet: Sheet1
AIA length measurements					Paper figure 3D
L1				L4				Day 1 Adult
Wild type	ctbp-1(n4784)			Wild type	ctbp-1(n4784)			Wild type	ctbp-1(n4784)		units = um
4.243	3.945			8.835	7.602			8.302	7.215
4.548	4.354			6.763	7.478			7.111	7.74
4.539	3.856			7.972	6.092			7.699	7.354
3.85	5.841			6.396	5.245			7.306	11.16
4.48	5.025			6.148	7.077			6.997	9.443
4.785	4.582			7.303	7.46			6.917	6.773
4.705	4.332			8.37	7.249			8.073	7.314
4.282	4.483			6.427	8.347			8.68	9.126
4.634	4.727			5.458	7.109			7.761	9.624
5.022	4.369			6.133	6.359			7.786	9.781
5.076	3.786			7.309	6.057			7.323	8.807
3.818	3.728			5.644	8.291			8.606	7.386
4.636	4.599			6.745	6.137			8.032	9.306
3.873	4.75			5.719	8.078			7.956	10.069
4.131	4.667			5.731	7.026			7.823	10.402
4.217	4.013			5.956	7.354			7.215	8.4
4.702	5.02			6.083	8.209			8.812	10.532
4.871	4.035			6.908	7.665			7.744	8.716
3.832	4.346			6.586	7.152			7.508	6.257
5.83	4.146			5.857	7.584			7.23	8.35
4.978	4.201			6.022	6.014			7.259	9.273
3.357	4.617			6.153	7.034			7.424	7.677
4.584	4			6.471	6.169			5.889	9.335
4.035	4.286			6.921	6.607			6.88	9.692
4.448	5.048			5.843	7.607			6.859	9.943
4.199	3.994			5.434	6.97			7.369	9.568
4.759	4.405			7.897	7.932			7.419	9.539
3.845	4.555			6.838	6.552			6.404	9.968
4.612	4.583			5.442	6.166			9.044	7.14
4.457	4.152			6.441	7.673			7.719	7.347
