# Supplementary material for: The transcriptional corepressor CTBP-1 acts with the SOX family transcription factor EGL-13 to maintain AIA interneuron cell identity in Caenorhabditis elegans
Source: eLife journal article supplement (doi:10.7554/elife.74557), 2022-01-20
Supplement: fig3-data1 [file Fig 3F-G_nIs743 projections.xlsx]

## Sheet: Sheet1
AIA projection counts for nIs743 (AIA rescue) experiments						Paper figure 3F-G
strain	stage	repeat	# w/ anterior proj.	% w/ anterior proj.	# w/ posterior proj.	% w/ posterior proj.			n = 30 for all repeats
WT	L1	1	0	0	0	0
		2	0	0	0	0
		3	0	0	0	0
	L4	1	0	0	0	0
		2	0	0	0	0
		3	0	0	0	0
	D1	1	1	3.33333	0	0
		2	1	3.33333	0	0
		3	0	0	0	0
ctbp-1(n4784)	L1	1	4	13.3333	0	0
		2	2	6.66667	0	0
		3	3	10	0	0
	L4	1	11	36.6667	7	23.3333
		2	7	23.3333	5	16.6667
		3	11	36.6667	7	23.3333
	D1	1	13	43.3333	9	30
		2	13	43.3333	12	40
		3	14	46.6667	9	30
ctbp-1(n4784);nIs743	L1	1	1	3.33333	1	3.33333
		2	0	0	0	0
		3	0	0	0	0
	L4	1	1	3.33333	1	3.33333
		2	1	3.33333	0	0
		3	0	0	1	3.33333
	D1	1	1	3.33333	1	3.33333
		2	2	6.66667	0	0
		3	0	0	2	6.66667
