# Supplementary material for: The transcriptional corepressor CTBP-1 acts with the SOX family transcription factor EGL-13 to maintain AIA interneuron cell identity in Caenorhabditis elegans
Source: eLife journal article supplement (doi:10.7554/elife.74557), 2022-01-20
Supplement: fig3-data1 [file Fig 3H_nIs743 lengths.xlsx]

## Sheet: Sheet1
AIA length measurements for nIs743 (AIA rescue) experiments						Paper figure 3H
L1					L4					Day 1 Adult
Wild type	ctbp-1(n4784)	ctbp-1;nIs743[PAIA::ctbp-1(+)]			Wild type	ctbp-1(n4784)	ctbp-1;nIs743[PAIA::ctbp-1(+)]			Wild type	ctbp-1(n4784)	ctbp-1;nIs743[PAIA::ctbp-1(+)]
5.267	5.586	4.662			6.266	5.848	5.674			9.44	8.593	7.657
3.977	5.457	4.602			5.555	6.908	4.972			8.993	9.275	6.223
5.116	5.032	3.945			5.335	6.715	6.732			8.335	8.719	6.466
3.913	4.419	4.044			6.037	6.606	6.763			8.102	10.912	7.429
4.892	4.306	4.021			5.557	6.793	4.1			7.14	6.696	8.433
4.591	4.287	4.212			6.1	8.852	6.251			8.996	7.948	6.437
4.707	4.257	6.047			5.964	6.511	5.838			8.293	7.92	7.455
4.7	3.479	4.831			6.037	6.613	5.719			8.21	10.499	7.028
4.988	3.708	4.216			6.223	5.932	6.131			8.088	9.869	6.094
4.922	3.768	4.438			5.387	6.257	4.976			8.791	9.374	8.455
4.569	4.153	4.158			6.398	7.425	6.858			6.753	8.149	9.175
4.69	3.869	3.887			6.955	7.054	7.388			7.933	9.578	7.688
5.095	4.952	4.054			6.469	5.462	5.721			7.824	7.33	7.615
5.368	4.22	4.898			7.091	6.903	5.429			9.089	7.688	7.795
4.218	3.953	5.41			6.171	5.192	5.739			7.579	7.561	7.207
3.992	3.842	4.075			5.49	5.675	5.827			7.28	7.425	7.635
4.536	4.316	4.689			6.251	8.232	5.954			7.303	7.729	8.512
4.621	4.957	4.996			6.07	9.606	6.676			6.927	10.803	7.892
3.958	3.702	3.923			5.565	6.215	5.686			8.041	8.201	7.424
3.734	4.65	5.763			6.402	6.458	4.763			8.38	8.677	7.443
4.263	3.755	4.783			4.979	7.212	9.238			8.278	7.587	7.028
3.952	4.406	5.986			5.979	6.565	5.918			7.053	7.755	8.815
5.616	4.228	5.709			6.681	6.835	6.593			7.315	7.35	8.267
4.681	4.74	4.631			6.272	8.364	8.02			7.124	7.692	6.684
5.234	4.724	4.718			5.684	9.18	7.533			7.737	6.776	7.363
4.462	4.325	4.907			5.711	7.402	8.481			8.314	9.309	7.232
4.351	4.25	4.41			5.571	7.112	5.886			6.556	8.177	7.506
4.391	5.674	3.233			5.45	6.392	5.434			7.3	8.749	8.052
4.295	5.196	5.1			6.361	8.579	5.632			6.827	9.057	7.117
4.308	3.447	4.38			6.257	7.61	5.504			7.742	9.237	7.646
					5.202		5.226					6.109
units = um
