# Supplementary material for: The transcriptional corepressor CTBP-1 acts with the SOX family transcription factor EGL-13 to maintain AIA interneuron cell identity in Caenorhabditis elegans
Source: eLife journal article supplement (doi:10.7554/elife.74557), 2022-01-20
Supplement: fig3-data1 [file Fig 3J-K_Heat Shock projections.xlsx]

## Sheet: Sheet1
AIA projection counts for nEx2351(HS rescue) experiments						Paper figure 3J-K
strain	stage	repeat	# w/ anterior proj.	% w/ anterior proj.	# w/ posterior proj.	% w/ posterior proj.			n = 30 for all repeats
Wild type	L4	1	1	3.33333	0	0
		2	0	0	0	0
		3	0	0	0	0
	D1	1	1	3.33333	0	0
		2	0	0	0	0
		3	0	0	0	0
nIs348;ctbp-1(n4784)	L4	1	13	43.3333	8	26.6667
		2	12	40	11	36.6667
		3	6	20	5	16.6667
	D1	1	16	53.3333	8	26.6667
		2	16	53.3333	9	30
		3	13	43.3333	8	26.6667
ctbp-1(n4784);nEx2351 (no HS)	L4	1	11	36.6667	8	26.6667
		2	9	30	4	13.3333
		3	12	40	5	16.6667
	D1	1	17	56.6667	13	43.3333
		2	12	40	9	30
		3	14	46.6667	16	53.3333
ctbp-1(n4784);nEx2351 (+ HS)	D1	1	11	36.6667	8	26.6667
		2	9	30	4	13.3333
		3	13	43.3333	10	33.3333
