# Supplementary material for: The transcriptional corepressor CTBP-1 acts with the SOX family transcription factor EGL-13 to maintain AIA interneuron cell identity in Caenorhabditis elegans
Source: eLife journal article supplement (doi:10.7554/elife.74557), 2022-01-20
Supplement: fig3-data1 [file Fig 3L_Heat Shock lengths.xlsx]

## Sheet: Sheet1
AIA length measurements for nEx2351 (heat shock rescue) experiments							Paper Figure 3L
L4s					Day 1 Adults
Wild type	ctbp-1(n4784)	ctbp-1;nEx2351 (no HS)			Wild type	ctbp-1(n4784)	ctbp-1;nEx2351 (- HS)	ctbp-1;nEx2351 (+ HS)		units = um
6.266	8.328	7.183			7.52	8.651	6.659	9.53
5.555	7.271	9.588			7.053	6.706	9.194	7.637
5.335	8.71	6.059			7.537	5.812	5.938	7.849
6.037	8.738	9.243			5.76	7.165	8.166	9.891
5.557	8.046	8.539			7.088	7.371	6.469	5.36
6.1	6.061	5.564			6.242	9.571	6.676	7.886
5.964	7.211	5.405			5.626	6.488	8.63	7.361
6.037	6.665	8.768			6.787	7.133	8.204	7.075
6.223	9.985	7.512			7.568	7.394	7.761	9.545
5.387	5.448	8.628			7.801	7.097	11.834	8.832
6.398	7.288	5.952			7.448	6.458	6.947	8.291
6.955	6.719	6.556			5.787	6.811	8.941	8.264
6.469	5.251	8.759			8.141	10.061	6.764	10.794
7.091	7.395	8.729			7.287	11.841	9.584	6.63
6.171	8.024	7.113			7.797	7.579	8.627	7.17
5.49	7.404	7.682			8.753	6.436	10.571	9.239
6.251	7.535	6.835			7.241	7.508	5.034	7.98
6.07	6.483	6.775			6.79	7.073	7.72	8.457
5.565	8.092	8.455			6.508	7.684	7.969	7.899
6.402	6.103	7.672			6.597	11.02	6.472	7.422
4.979	8.019	5.888			6.421	7.169	7.954	10.699
5.979	9.173	7.829			7.872	8.916	7.663	6.354
6.681	5.97	9.501			7.735	7.168	7.165	8.255
6.272	5.674	5.963			6.311	6.378	7.46	5.03
5.684	9.335	6.711			6.943	5.915	7.383	9.307
5.711	6.483	7.144			7.263	6.672	10.667	5.615
5.571	5.351	8.168			6.244	8.242	6.305	6.398
5.45	6.928	7.887			5.967	11.041	7.596	7.199
6.361	5.621	5.565			6.923	8.028	7.167	9.862
6.257	7.773	5.295			6.986	8.162	8.053	5.679
5.202	9.297				6.166	9.867	9.69
