# Supplementary material for: The transcriptional corepressor CTBP-1 acts with the SOX family transcription factor EGL-13 to maintain AIA interneuron cell identity in Caenorhabditis elegans
Source: eLife journal article supplement (doi:10.7554/elife.74557), 2022-01-20
Supplement: fig3-data1 [file Fig S4B_blinded scoring results.xlsx]

## Sheet: Sheet1
AIA morphology blinded scoring results							Paper Figure S4B
stage	strain	repeat	# "elongated"	# total	% "elongated"
L1	WT	1	1	20	5
		2	1	20	5
		3	0	20	0
L1	ctbp-1	1	3	20	15
		2	1	20	5
		3	0	20	0
L4	WT	1	4	20	20
		2	3	20	15
		3	2	21	9.52381
L4	ctbp	1	13	20	65
		2	9	20	45
		3	11	20	55
Adult	WT	1	4	20	20
		2	6	20	30
		3	8	20	40
Adult	ctbp	1	9	20	45
		2	7	20	35
		3	11	21	52.381
