# Supplementary material for: The transcriptional corepressor CTBP-1 acts with the SOX family transcription factor EGL-13 to maintain AIA interneuron cell identity in Caenorhabditis elegans
Source: eLife journal article supplement (doi:10.7554/elife.74557), 2022-01-20
Supplement: fig4-data1 [file Fig 4_S1A_diacetyl_chemotaxis.xlsx]

## Sheet: Sheet1
L4s, chemotaxis to 10^-4 Diacetyl in 100% EtOH								Paper Figure S6A
strain	trial	odorant	conc	odor	control	Chemotaxis Index
N2	1	DA	10^-4	95	11	0.792453
	2	DA	10^-4	76	18	0.617021
	2	DA	10^-4	89	14	0.728155
	4	DA	10^-4	71	26	0.463918
JN580	1	DA	10^-4	88	10	0.795918
	2	DA	10^-4	55	4	0.864407
	3	DA	10^-4	49	9	0.689655
	4	DA	10^-4	28	16	0.272727
nIs175;n4784	1	DA	10^-4	25	18	0.162791
	2	DA	10^-4	32	14	0.391304
	3	DA	10^-4	39	21	0.3
