# Supplementary material for: The transcriptional corepressor CTBP-1 acts with the SOX family transcription factor EGL-13 to maintain AIA interneuron cell identity in Caenorhabditis elegans
Source: eLife journal article supplement (doi:10.7554/elife.74557), 2022-01-20
Supplement: fig4-data1 [file Fig 4_S1B_isoamyl alcohol_chemotaxis.xlsx]

## Sheet: Sheet1
L4s, chemotaxis to 10^-3 Isoamyl Alcohol in 100% EtOH								Paper Figure S6B
strain	trial	odorant	conc	odor	control	Chemotaxis Index
N2	1	IAA	10^-3	62	17	0.56962
	2	IAA	10^-3	67	10	0.74026
	3	IAA	10^-3	34	10	0.545455
JN580	1	IAA	10^-3	54	16	0.542857
	2	IAA	10^-3	54	10	0.6875
	3	IAA	10^-3	80	6	0.860465
nIs175;n4784	1	IAA	10^-3	25	18	0.162791
	2	IAA	10^-3	41	18	0.389831
	3	IAA	10^-3	37	20	0.298246
