# Supplementary material for: The transcriptional corepressor CTBP-1 acts with the SOX family transcription factor EGL-13 to maintain AIA interneuron cell identity in Caenorhabditis elegans
Source: eLife journal article supplement (doi:10.7554/elife.74557), 2022-01-20
Supplement: fig4-data1 [file Fig 4B-C_L1s_butanone adaptation.xlsx]

## Sheet: Sheet1
L1s_butanone adaptation							Paper Figures 4B-C
strain	date	adapted?	odor	control	Chemotaxis Index
N2	2020-10-30	-	201	43	0.647541
		-	130	50	0.444444
	2020-11-28	-	153	27	0.7
		-	144	11	0.858065
	2020-11-30	-	178	8	0.913978
		-	176	13	0.862434
N2	2020-10-30	+	148	187	-0.116418
		+	112	98	0.0666667
	2020-11-28	+	80	118	-0.191919
		+	55	77	-0.166667
	2020-11-30	+	36	56	-0.217391
		+	40	67	-0.252336
nIs175	2020-10-30	-	43	17	0.433333
		-			#DIV/0!
	2020-11-28	-	97	13	0.763636
		-	176	25	0.751244
	2020-11-30	-	168	13	0.856354
		-	96	10	0.811321
	2020-12-23	-	125	17	0.760563
		-	106	14	0.766667
nIs175	2020-10-30	+	26	39	-0.2
		+	45	48	-0.0322581
	2020-11-28	+	44	47	-0.032967
		+	82	102	-0.108696
	2020-11-30	+	40	72	-0.285714
		+	61	102	-0.251534
	2020-12-23	+	70	80	-0.0666667
		+	62	97	-0.220126
JN580	2020-10-30	-	43	16	0.457627
		-	50	16	0.515152
	2020-11-28	-	92	60	0.210526
		-	46	23	0.333333
	2020-11-30	-	33	19	0.269231
		-	88	30	0.491525
JN580	2020-10-30	+	37	18	0.345455
		+			#DIV/0!
	2020-11-28	+	56	23	0.417722
		+	35	28	0.111111
	2020-11-30	+	58	53	0.045045
		+	53	49	0.0392157
nIs175;n4784	2020-10-30	-	42	27	0.217391
		-	44	27	0.239437
	2020-11-28	-	74	20	0.574468
		-	48	16	0.5
	2020-11-30	-	105	23	0.640625
		-	161	73	0.376068
nIs175;n4784	2020-10-30	+	44	35	0.113924
		+	21	39	-0.3
	2020-11-28	+	29	31	-0.0333333
		+	47	80	-0.259843
	2020-11-30	+	80	127	-0.227053
		+	68	104	-0.209302
nIs175;n4784;nIs743	2020-10-30	-	37	25	0.193548
		-	35	20	0.272727
	2020-11-28	-	74	27	0.465347
		-	147	52	0.477387
	2020-11-30	-	135	45	0.5
		-	117	42	0.471698
nIs175;n4784;nIs743	2020-10-30	+	21	29	-0.16
		+	49	37	0.139535
	2020-11-28	+	73	116	-0.227513
		+	61	77	-0.115942
	2020-11-30	+	43	96	-0.381295
		+	196	253	-0.126949
