# Supplementary material for: The transcriptional corepressor CTBP-1 acts with the SOX family transcription factor EGL-13 to maintain AIA interneuron cell identity in Caenorhabditis elegans
Source: eLife journal article supplement (doi:10.7554/elife.74557), 2022-01-20
Supplement: fig4-data1 [file Fig 4D-E_L4s_butanone adaptation.xlsx]

## Sheet: Sheet1
L4s_butanone adaptation							Paper figures 4D-E
strain	adapted?	odor	control	Chemotaxis Index
N2	-	221	46	0.655431
	-	61	4	0.876923
	-	659	98	0.741083
	-	250	31	0.779359
	-	200	1	0.99005
	-	313	1	0.993631
	-	167	10	0.887006
	-	192	7	0.929648
N2	+	73	186	-0.436293
	+	61	115	-0.306818
	+	175	358	-0.34334
	+	54	109	-0.337423
	+	31	117	-0.581081
	+	31	111	-0.56338
	+	39	73	-0.303571
	+	22	62	-0.47619
nIs175	-	221	23	0.811475
	-	172	17	0.820106
	-	405	31	0.857798
	-	305	23	0.859756
	-	85	0	1
	-	233	6	0.949791
	-	156	3	0.962264
	-	180	1	0.98895
nIs175	+	74	152	-0.345133
	+	71	147	-0.348624
	+	100	197	-0.326599
	+	135	222	-0.243697
	+	38	87	-0.392
	+	27	89	-0.534483
	+	21	81	-0.588235
	+	47	101	-0.364865
JN580	-	225	44	0.672862
	-	351	29	0.847368
	-	213	8	0.927602
	-	147	4	0.94702
	-	402	57	0.751634
	-	302	72	0.614973
	-	105	3	0.944444
	-	179	13	0.864583
	-	144	5	0.932886
JN580	+	76	86	-0.0617284
	+	94	106	-0.06
	+	60	46	0.132075
	+	122	156	-0.122302
	+	71	31	0.392157
	+	76	34	0.381818
	+	103	48	0.364238
	+	74	28	0.45098
	+	130	62	0.354167
nIs175;n4784	-	76	32	0.407407
	-	155	45	0.55
	-	372	142	0.447471
	-	301	113	0.454106
	-	137	17	0.779221
	-	250	47	0.683502
	-	136	25	0.689441
	-	97	15	0.732143
	-	139	23	0.716049
	-	66	25	0.450549
	-	105	41	0.438356
nIs175;n4784	+	97	128	-0.137778
	+	98	99	-0.00507614
	+	145	132	0.0469314
	+	143	126	0.063197
	+	83	71	0.0779221
	+	80	79	0.00628931
	+	73	50	0.186992
	+	57	87	-0.208333
	+	75	73	0.0135135
	+	59	64	-0.0406504
	+	75	45	0.25
nIs175;n4784;nIs743	-	211	54	0.592453
	-	138	48	0.483871
	-	464	101	0.642478
	-	506	185	0.464544
	-	202	18	0.836364
	-	159	14	0.83815
nIs175;n4784;nIs743	+	67	141	-0.355769
	+	33	74	-0.383178
	+	106	270	-0.43617
	+	198	321	-0.236994
	+	49	117	-0.409639
	+	58	62	-0.0333333
