# Supplementary material for: The transcriptional corepressor CTBP-1 acts with the SOX family transcription factor EGL-13 to maintain AIA interneuron cell identity in Caenorhabditis elegans
Source: eLife journal article supplement (doi:10.7554/elife.74557), 2022-01-20
Supplement: fig4-data1 [file Fig 4F-G_Heat shock_butanone adaptation.xlsx]

## Sheet: Sheet1
Day 1 adults_heat shock							Paper figures 4F-G
strain	date	adapted?	odor	control	Chemotaxis Index
nIs175	2020-12-19	-	77	0	1
		-	85	1	0.976744
	2020-12-20	-	97	1	0.979592
		-	105	3	0.944444
	2020-12-27	-	150	3	0.960784
		-	109	3	0.946429
		-	143	2	0.972414
	2021-01-06	-	126	4	0.938462
		-	60	4	0.875
nIs175	2020-12-19	+	68	111	-0.240223
		+	62	96	-0.21519
	2020-12-20	+	40	66	-0.245283
		+	70	81	-0.0728477
		+	52	62	-0.0877193
	2020-12-27	+	24	72	-0.5
		+	40	74	-0.298246
		+	47	77	-0.241935
	2021-01-06	+	58	127	-0.372973
		+	50	106	-0.358974
nIs175;n4784	2020-12-19	-	141	12	0.843137
		-	64	9	0.753425
	2020-12-27	-	68	16	0.619048
		-	85	12	0.752577
		-	95	17	0.696429
	2021-01-06	-	80	33	0.415929
		-	100	37	0.459854
	2021-01-27	-	68	11	0.721519
		-	54	13	0.61194
		-	88	15	0.708738
nIs175;n4784	2020-12-19	+	54	36	0.2
		+	41	31	0.138889
	2020-12-27	+	51	30	0.259259
		+	25	26	-0.0196078
		+	37	34	0.0422535
	2021-01-06	+	64	72	-0.0588235
		+	64	60	0.0322581
	2021-01-27	+	43	31	0.162162
		+	44	22	0.333333
		+	64	46	0.163636
nIs175;n4784;nEx2351 (no hs)	2020-12-21	-	174	21	0.784615
		-	122	26	0.648649
		-	120	16	0.764706
	2020-12-22	-	105	24	0.627907
		-	68	19	0.563218
		-	60	23	0.445783
	2021-01-06	-	152	43	0.558974
		-	160	55	0.488372
nIs175;n4784;nEx2351 (no hs)	2020-12-21	+	44	24	0.294118
		+	44	45	-0.011236
		+	67	43	0.218182
	2020-12-22	+	56	44	0.12
		+	37	20	0.298246
		+	43	38	0.0617284
	2021-01-06	+	56	47	0.0873786
		+	51	52	-0.00970874
nIs175;n4784;nEx2351 (w/hs)	2020-12-19	-	40	12	0.538462
		-	45	5	0.8
	2020-12-20	-	60	10	0.714286
	2020-12-21	-	44	12	0.571429
	2020-12-22	-	37	14	0.45098
nIs175;n4784;nEx2351 (w/hs)	2020-12-19	+	36	51	-0.172414
		+	25	28	-0.0566038
	2020-12-20	+	23	28	-0.0980392
	2020-12-21	+	22	28	-0.12
	2020-12-22	+	21	32	-0.207547
