# Supplementary material for: The transcriptional corepressor CTBP-1 acts with the SOX family transcription factor EGL-13 to maintain AIA interneuron cell identity in Caenorhabditis elegans
Source: eLife journal article supplement (doi:10.7554/elife.74557), 2022-01-20
Supplement: fig6-data1 [file Fig 6_S1B_egl-13 alleles.xlsx]

## Sheet: Sheet1
nIs175 misexpression in AIAs, egl-13 allele scoring (at L4 stage)							Paper figure S8B
egl-13 strains	repeat	OFF	ON	%ON	n
Wild type	1	100	0	0	100
	2	100	0	0	100
	3	100	0	0	100
ctbp-1(n4784)	1	1	99	99	100
	2	0	100	100	100
	3	2	98	98	100
egl-13(n5937) ctbp-1(n4784)	1	98	2	2	100
	2	97	3	3	100
	3	98	2	2	100
egl-13(n6013) ctbp-1(n4784)	1	85	15	15	100
	2	88	13	12.8713	101
	3	87	13	13	100
egl-13(n6313) ctbp-1(n4784)	1	65	35	35	100
	2	80	20	20	100
	3	78	22	22	100
