# Supplementary material for: The transcriptional corepressor CTBP-1 acts with the SOX family transcription factor EGL-13 to maintain AIA interneuron cell identity in Caenorhabditis elegans
Source: eLife journal article supplement (doi:10.7554/elife.74557), 2022-01-20
Supplement: fig6-data1 [file Fig 6_S1C_egl-13 rescues.xlsx]

## Sheet: Sheet1
egl-13 rescue strain scoring at L4 stage							Paper figure S8C
egl-13 rescues
strain	injected at [conc]	repeat	OFF in AIAs	ON	%ON	n
ctbp-1	n/a	1	1	49	98	50
		2	1	49	98	50
		3	0	50	100	50
n5937	n/a	1	47	3	6	50
		2	56	3	5.08475	59
		3	50	1	1.96078	51
n5937	5	1	3	47	94	50
+ nEx3062	5	2	8	42	84	50
	5	3	8	44	84.6154	52
n5937	5	1	6	44	88	50
+ nEx3063	5	2	5	46	90.1961	51
	5	3	6	44	88	50
n6013	n/a	1	48	4	7.69231	52
		2	46	4	8	50
		3	49	5	9.25926	54
n6013	2	1	18	32	64	50
+ nEx3080	2	2	17	33	66	50
	2	3	16	35	68.6275	51
n6313	n/a	1	32	19	37.2549	51
		2	41	23	35.9375	64
		3	38	19	33.3333	57
n6313	5	1	13	37	74	50
+ nEx3074	5	2	13	38	74.5098	51
	5	3	5	45	90	50
n6313	2	1	7	43	86	50
+ nEx3079	2	2	10	42	80.7692	52
	2	3	2	48	96	50
