# Supplementary material for: The transcriptional corepressor CTBP-1 acts with the SOX family transcription factor EGL-13 to maintain AIA interneuron cell identity in Caenorhabditis elegans
Source: eLife journal article supplement (doi:10.7554/elife.74557), 2022-01-20
Supplement: fig6-data1 [file Fig 6_S2B_ttx-3 alleles.xlsx]

## Sheet: Sheet1
nIs175 misexpression in AIAs, ttx-3 allele scoring (at L4 stage)							Paper figure S9B
ttx-3 strains	repeat	OFF	ON	%ON	n
Wild type	1	100	0	0	100
	2	100	0	0	100
	3	100	0	0	100
ctbp-1(n4784)	1	1	99	99	100
	2	3	97	97	100
	3	1	99	99	100
ctbp-1(n4784) ttx-3(n6308)	1	59	41	41	100
	2	61	47	43.5185	108
	3	66	34	34	100
ctbp-1(n4784) ttx-3(n6316)	1	92	8	8	100
	2	94	7	6.93069	101
	3	98	5	4.85437	103
ctbp-1(n4784) ttx-3(ks5)	1	55	45	45	100
	2	62	38	38	100
	3	67	45	40.1786	112
ctbp-1(n4784) ttx-3(ot22)	1	57	43	43	100
	2	66	35	34.6535	101
	3	66	34	34	100
