# Supplementary material for: The transcriptional corepressor CTBP-1 acts with the SOX family transcription factor EGL-13 to maintain AIA interneuron cell identity in Caenorhabditis elegans
Source: eLife journal article supplement (doi:10.7554/elife.74557), 2022-01-20
Supplement: fig6-data1 [file Fig 6_S2C_ttx-3 rescues.xlsx]

## Sheet: Sheet1
ttx-3 rescue strains scoring at L4 stage								Paper figure S9C
ttx-3 rescues
strain	injected at [conc]	repeat	OFF in AIAs	ON	%ON	n
ctbp-1	n/a	1	1	49	98	50
		2	0	50	100	50
		3	2	49	96.0784	51
n6308	n/a
n6308	5	1	14	36	72	50
+ nEx3067	5	2	11	40	78.4314	51
	5	3	11	39	78	50
n6308	5	1	10	40	80	50
+ nEx3068	5	2	10	41	80.3922	51
	5	3	9	41	82	50
n6308	5	1	3	47	94	50
+ nEx3069	5	2	4	47	92.1569	51
	5	3	4	46	92	50
n6316	n/a
n6316	5	1	20	31	60.7843	51
+ nEx3073	5	2	20	30	60	50
	5	3	18	32	64	50
n6316	2	1	16	34	68	50
+ nEx3078	2	2	20	31	60.7843	51
	2	3	17	36	67.9245	53
