# Supplementary material for: The transcriptional corepressor CTBP-1 acts with the SOX family transcription factor EGL-13 to maintain AIA interneuron cell identity in Caenorhabditis elegans
Source: eLife journal article supplement (doi:10.7554/elife.74557), 2022-01-20
Supplement: fig6-data1 [file Fig 6D_misexpression in sups.xlsx]

## Sheet: Sheet1
nIs175 misexpression in AIAs of suppressor strains, time course								Paper figure 6D
Batch 1	scored 9/29/20-10/1/20
	nIs175			nIs175;ctbp-1(n4784)			nIs175;n4784 egl-13(n5937)			nIs175;n4784 ttx-3(n6308)
stage	ON	OFF	%ON	ON	OFF	%ON	ON	OFF	%ON	ON	OFF	%ON
L1	0	107	0	1	99	1	1	104	0.952381	5	96	4.9505
L2	0	106	0	40	60	40	0	101	0	41	99	29.2857
L3	0	119	0	89	11	89	0	119	0	32	71	31.068
L4	0	103	0	124	1	99.2	0	108	0	50	74	40.3226
Day 1	0	102	0	127	0	100	0	122	0	46	59	43.8095
Batch 2	scored 10/6/20-10/8/20
	nIs175			nIs175;ctbp-1(n4784)			nIs175;n4784 egl-13(n5937)			nIs175;n4784 ttx-3(n6308)
stage	ON	OFF	%ON	ON	OFF	%ON	ON	OFF	%ON	ON	OFF	%ON
L1	0	107	0	27	83	24.5455	0	115	0	15	123	10.8696
L2	0	101	0	52	50	50.9804	0	115	0	31	85	26.7241
L3	0	132	0	107	7	93.8596	0	145	0	47	66	41.5929
L4	0	125	0	122	3	97.6	0	131	0	50	61	45.045
Day 1	0	102	0	122	0	100	0	105	0	47	70	40.1709
Batch 3	scored 10/13/20-10/15/20
	nIs175			nIs175;ctbp-1(n4784)			nIs175;n4784 egl-13(n5937)			nIs175;n4784 ttx-3(n6308)
stage	ON	OFF	%ON	ON	OFF	%ON	ON	OFF	%ON	ON	OFF	%ON
L1	0	106	0	11	111	9.01639	0	103	0	7	121	5.46875
L2	0	105	0	46	68	40.3509	0	106	0	17	86	16.5049
L3	0	103	0	118	6	95.1613	0	113	0	43	57	43
L4	0	171	0	114	0	100	0	113	0	63	54	53.8462
Day 1	0	107	0	133	0	100	0	105	0	52	57	47.7064
