# Supplementary material for: The transcriptional corepressor CTBP-1 acts with the SOX family transcription factor EGL-13 to maintain AIA interneuron cell identity in Caenorhabditis elegans
Source: eLife journal article supplement (doi:10.7554/elife.74557), 2022-01-20
Supplement: fig6-data1 [file Fig 6F-G_AIA projections.xlsx]

## Sheet: Sheet1
AIA projection counts for suppressors					Paper figure 6F-G
strain	stage	repeat	# w/ anterior proj.	% w/ anterior proj.	# w/ posterior proj.	% w/ posterior proj.
Wild type	L1	1	0	0	0	0		n = 30 per repeat
		2	0	0	0	0
		3	0	0	0	0
	L4	1	1	3.33333	0	0
		2	0	0	0	0
		3	0	0	0	0
	D1	1	0	0	0	0
		2	0	0	0	0
		3	0	0	0	0
nIs348;ctbp-1(n4784)	L1	1	3	10	0	0
		2	1	3.33333	1	3.33333
		3	4	13.3333	0	0
	L4	1	12	40	9	30
		2	10	33.3333	8	26.6667
		3	11	36.6667	5	16.6667
	D1	1	18	60	11	36.6667
		2	14	46.6667	10	33.3333
		3	17	56.6667	11	36.6667
nIs348;egl-13(n5937) ctbp-1	L1	1	4	13.3333	1	3.33333
		2	0	0	0	0
		3	2	6.66667	1	3.33333
	L4	1	10	33.3333	10	33.3333
		2	8	26.6667	5	16.6667
		3	9	30	6	20
	D1	1	12	40	14	46.6667
		2	9	30	5	16.6667
		3	9	30	11	36.6667
nIs348;ttx-3(n6308) ctbp-1	L1	1	3	10	0	0
		2	1	3.33333	0	0
		3	2	6.66667	0	0
	L4	1	3	10	2	6.66667
		2	4	13.3333	1	3.33333
		3	4	13.3333	3	10
	D1	1	7	23.3333	3	10
		2	4	13.3333	2	6.66667
		3	4	13.3333	4	13.3333
