# Supplementary material for: The transcriptional corepressor CTBP-1 acts with the SOX family transcription factor EGL-13 to maintain AIA interneuron cell identity in Caenorhabditis elegans
Source: eLife journal article supplement (doi:10.7554/elife.74557), 2022-01-20
Supplement: fig6-data1 [file Fig 6H_AIA lengths.xlsx]

## Sheet: Sheet1
AIA length measurements in suppressor strains					Paper figure 6H				units = um
L1						L4s					Day 1 Adults
Wild type	ctbp-1(n4784)	egl-13(n5937) ctbp-1	ctbp-1 ttx-3(n6308)			Wild type	ctbp-1(n4784)	egl-13(n5937) ctbp-1	ctbp-1 ttx-3(n6308)		Wild type	ctbp-1(n4784)	egl-13(n5937) ctbp-1	ctbp-1 ttx-3(n6308)
5.17	5.29	3.493	4.443			5.633	7.531	5.719	7.159		6.255	7.265	7.296	7.975
5.081	4.282	3.348	3.55			5.857	7.337	7.908	8.688		7.14	10.971	9.058	8.549
5.027	5.433	6.135	4.053			7.399	5.979	8.445	9.09		7.781	6.689	5.92	5.744
5.045	4.487	5.58	4.707			8.77	7.643	9.593	6.497		9.15	9.909	6.268	7.592
5.276	4.386	4.73	4.694			5.752	7.024	8.73	7.108		5.56	9.889	9.855	7.957
3.595	5.902	4.534	3.945			6.383	7.183	6.999	7.624		6.519	7.03	7.281	9.639
4.036	5.557	5.079	5.292			5.716	7.843	9.404	5.97		6.258	9.799	7.067	5.533
4.838	4.583	4.162	4.487			5.724	7.554	8.139	7.965		8.708	9.387	11.022	6.613
4.772	5.552	5.913	5.215			7.28	8.061	7.716	5.793		9.02	8.026	10.034	5.198
5.024	5.376	5.473	4.676			5.3	7.859	9.219	7.175		7.754	9.246	9.11	5.941
4.819	4.358	5.126	4.643			4.352	8.798	7.764	8.048		10.707	8.483	10.243	8.93
5.402	4.492	4.151	5.004			5.503	6.31	6.369	7.903		7.528	9.547	7.964	7.237
5.531	5.412	5.289	4.329			5.826	7.204	9.026	8.08		6.468	8.749	6.224	8.536
4.571	4.503	4.946	3.49			5.493	7.073	7.193	7.552		7.152	7.665	8.074	5.707
5.29	4.992	6.15	3.591			6.28	6.704	9.593	8.188		8.748	7.905	7.279	6.629
6.33	5.044	6.357	4.959			7.335	7.09	6.084	7.629		6.959	8.174	7.492	7.644
4.893	5.105	6.105	4.385			7.309	6.527	8.84	9.439		6.126	7.642	10.256	9.965
4.185	5.368	5.426	4.355			8.738	6.354	9.109	9.279		7.537	8.385	8.219	8.164
4.73	5.471	3.97	3.912			6.291	7.478	8.671	5.86		9.29	7.029	11.144	10.045
3.953	5.209	5.21	5.024			7.391	7.523	9.566	6.144		7.114	8.417	6.037	8.061
3.748	6.097	5.536	3.878			7.602	7.048	7.806	6.897		6.259	8.332	10.856	9.437
5.542	6.061	5.013	4.935			7.527	9.285	9.401	5.837		6.863	8.213	6.382	8.507
5.455	4.057	3.299	6.469			7.383	7.787	7.284	4.977		8.567	7.381	9.362	8.156
6.057	4.008	5.516	3.951			7.217	8.022	10.747	5.357		7.983	9.262	6.942	9.047
5.347	4.194	5.926	4.437			6.438	8.483	7.671	8.312		6.875	8.262	7.479	9.02
5.838	4.102	4.636	5.749			6.451	6.057	8.013	4.865		7.306	9.348	6.516	6.494
3.672	4.484	5.051	5.347			7.495	7.502	7.092	5.359		6.675	7.006	7.806	6.723
4.606	4.93	6.056	4.774			7.883	8.602	5.84	7.017		9.159	7.049	11.027	7.684
5.014	5.058	3.962	4.213			7.744	7.588	8.68	7.874		8.188	8.215	10.25	9.101
4.239	5.985	4.717	3.554			4.938	8.462	8.206	7.6		8.036	9.001	10.26	7.81
		3.962						8.845	7.644			9.867		7.709
