# Supplementary material for: The transcriptional corepressor CTBP-1 acts with the SOX family transcription factor EGL-13 to maintain AIA interneuron cell identity in Caenorhabditis elegans
Source: eLife journal article supplement (doi:10.7554/elife.74557), 2022-01-20
Supplement: fig6-data1 [file Fig 6I-L_L1:L4 Adaptation.xlsx]

## Sheet: Sheet1
Butanone Adaptation in ctbp-1 suppressor strains, both L1 and L4						Paper figure 6I-L
L1s								L4s
strain	date	adapted?	odor	control	CI			strain	date	adapted?	odor	control	CI
nIs175	2021-01-02	-	294	32	0.803681			nIs175	2020-12-28	-	149	5	0.935065
		-	231	36	0.730337					-	148	8	0.897436
	2021-01-03	-	207	16	0.856502				2020-12-29	-	106	4	0.927273
		-	231	12	0.901235					-	83	5	0.886364
	2021-01-04	-	327	38	0.791781				2020-12-30	-	83	5	0.886364
		-	370	51	0.75772					-	68	6	0.837838
	2021-01-05	-	129	10	0.856115			nIs175	2020-12-28	+	48	62	-0.127273
		-	148	17	0.793939					+	30	43	-0.178082
nIs175	2021-01-02	+	50	168	-0.541284				2020-12-29	+	44	55	-0.111111
		+	76	157	-0.347639					+	33	54	-0.241379
	2021-01-03	+	43	73	-0.258621				2020-12-30	+	46	57	-0.106796
		+	52	101	-0.320261					+	38	67	-0.27619
	2021-01-04	+	132	221	-0.252125			nIs175;ctbp-1(n4784)	2020-12-28	-	81	25	0.528302
		+	133	197	-0.193939					-	67	29	0.395833
	2021-01-05	+	42	118	-0.475				2020-12-29	-	37	16	0.396226
		+	31	137	-0.630952					-	52	9	0.704918
nIs175;ctbp-1(n4784)	2021-01-02	-	138	97	0.174468				2020-12-30	-	53	16	0.536232
		-	181	100	0.288256			nIs175;ctbp-1(n4784)	2020-12-28	+	64	53	0.0940171
	2021-01-03	-	214	100	0.363057					+	54	60	-0.0526316
		-	123	36	0.54717				2020-12-29	+	36	28	0.125
	2021-01-04	-	342	106	0.526786					+	51	55	-0.0377358
		-	200	82	0.41844				2020-12-30	+	42	27	0.217391
	2021-01-05	-	93	28	0.53719					+	34	26	0.133333
		-	93	26	0.563025			nIs175;egl-13(n5937) n4784	2020-12-28	-	102	29	0.557252
nIs175;ctbp-1(n4784)	2021-01-02	+	68	151	-0.378995					-	103	16	0.731092
		+	103	142	-0.159184				2020-12-29	-	113	13	0.793651
	2021-01-03	+	78	121	-0.21608					-	118	22	0.685714
		+	71	80	-0.0596026				2020-12-30	-	83	15	0.693878
	2021-01-04	+	127	293	-0.395238					-	78	23	0.544554
		+	65	140	-0.365854			nIs175;egl-13(n5937) n4784	2020-12-28	+	26	54	-0.35
	2021-01-05	+	98	152	-0.216					+	31	32	-0.015873
		+	84	111	-0.138462				2020-12-29	+	51	54	-0.0285714
nIs175;egl-13(n5937) n4784	2021-01-02	-	88	45	0.323308					+	39	70	-0.284404
		-	125	72	0.269036					+	51	105	-0.346154
	2021-01-03	-	129	63	0.34375				2020-12-30	+	58	59	-0.00854701
		-	133	82	0.237209					+	45	44	0.011236
	2021-01-04	-	115	50	0.393939			nIs175;n4784 ttx-3(n6308)	2020-12-28	-	77	25	0.509804
		-	122	52	0.402299					-	43	14	0.508772
	2021-01-05	-	106	38	0.472222				2020-12-29	-	52	23	0.386667
		-	83	45	0.296875					-	53	29	0.292683
nIs175;egl-13(n5937) n4784	2021-01-02	+	65	91	-0.166667				2020-12-30	-	70	27	0.443299
		+	168	151	0.0532915					-	85	26	0.531532
	2021-01-03	+	50	76	-0.206349			nIs175;n4784 ttx-3(n6308)	2020-12-28	+	79	45	0.274194
		+	64	70	-0.0447761					+	128	47	0.462857
	2021-01-04	+	143	140	0.0106007				2020-12-29	+	66	35	0.306931
		+	92	74	0.108434					+	55	24	0.392405
	2021-01-05	+	54	68	-0.114754				2020-12-30	+	68	19	0.563218
		+	30	76	-0.433962					+	46	30	0.210526
nIs175;n4784 ttx-3(n6308)	2021-01-02	-	77	31	0.425926
		-	65	22	0.494253
	2021-01-03	-	103	65	0.22619
		-	113	66	0.26257
	2021-01-04	-	193	78	0.424354
		-	276	91	0.504087
	2021-01-05	-	123	59	0.351648
		-	122	39	0.515528
nIs175;n4784 ttx-3(n6308)	2021-01-02	+	89	97	-0.0430108
		+	77	91	-0.0833333
	2021-01-03	+	80	82	-0.0123457
		+	93	86	0.0391061
	2021-01-04	+	117	233	-0.331429
		+	116	182	-0.221477
	2021-01-05	+	110	72	0.208791
		+	65	43	0.203704
