# Supplementary material for: The transcriptional corepressor CTBP-1 acts with the SOX family transcription factor EGL-13 to maintain AIA interneuron cell identity in Caenorhabditis elegans
Source: eLife journal article supplement (doi:10.7554/elife.74557), 2022-01-20
Supplement: fig8-data1 [file Fig 8D_reporter expression.xlsx]

## Sheet: Sheet1
Reporter expression in AIAs of egl-13 ctbp-1 double mutants								Paper Figure 8D
genotype	stage	repeat	OFF	ON	%ON	n
otIs123[sra-11::gfp];n5937 n4784	L1	1	50	2	3.84615	52
		2	47	3	6	50
		3	48	2	4	50
	L4	1	50	0	0	50
		2	49	1	2	50
		3	49	1	2	50
ivEx138[glr-2::gfp];n5937 n4784	L1	1	48	2	4	50
		2	46	4	8	50
		3	50	2	3.84615	52
	L4	1	48	2	4	50
		2	47	3	6	50
		3	49	1	2	50
nEx[acbp-6::gfp];n5937 n4784	L1	1	50	0	0	50
		2	50	0	0	50
		3	49	1	2	50
	L4	1	50	0	0	50
		2	49	1	2	50
		3	52	0	0	52
